# Supplementary material for: Evaluation of cobalt oxide, copper oxide and their solid solutions as heterogeneous catalysts for Fenton-degradation of dye pollutants
Source: Royal Society of Chemistry journal article supplement (doi:10.1039/c5ra18923c), 2015-01-01
Supplement: c5ra18923c1.pdf [file c5ra18923c1.pdf]

## **Electronic supplementary information**

### **Evaluation of cobalt oxide, copper oxide and their solid solutions as heterogeneous catalysts for Fenton-degradation of dye pollutants**

**Yi Shen\*, Zhihui Zhang and Kaijun Xiao\***

College of Light Industry and Food Sciences, South China University of Technology, Wushan Road, Tianhe District, Guangzhou, 510640, China. E-mails: [feyshen@scut.edu.cn](mailto:feyshen@scut.edu.cn) (Y Shen) and [fekjxiao@scut.edu.cn](mailto:fekjxiao@scut.edu.cn) (K. Xiao)

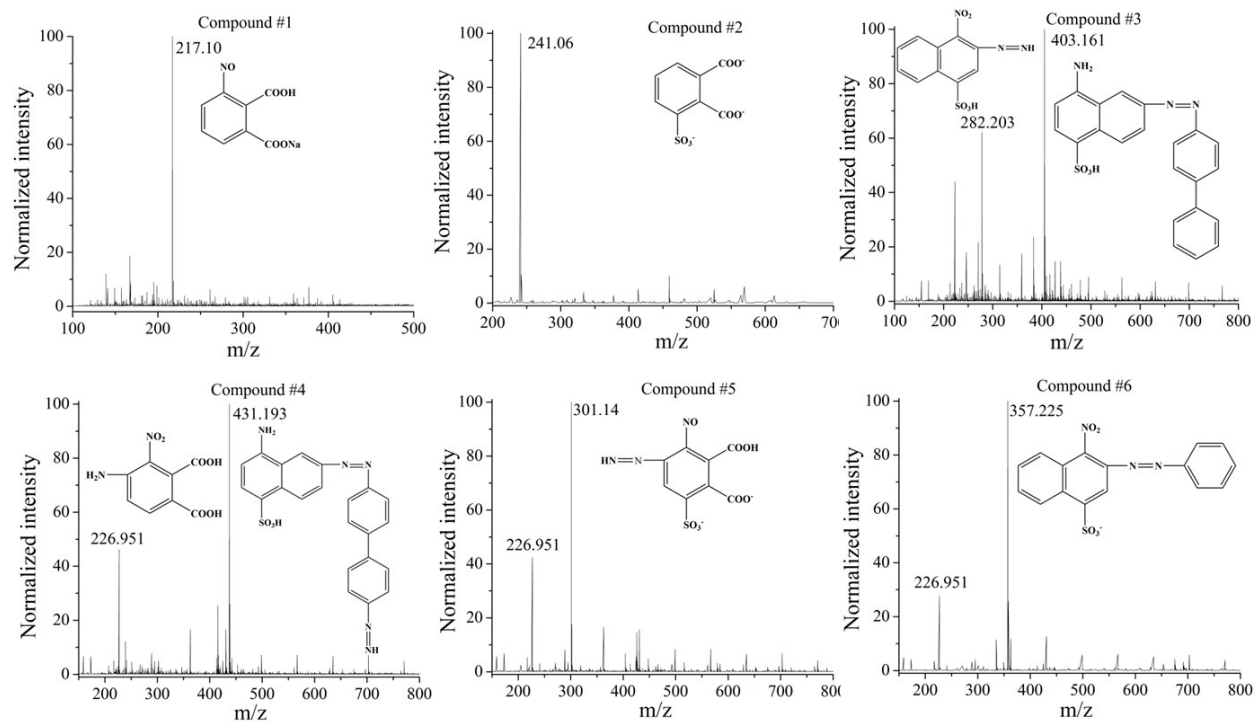

**Figure S1** LC-MS results of degradation products.

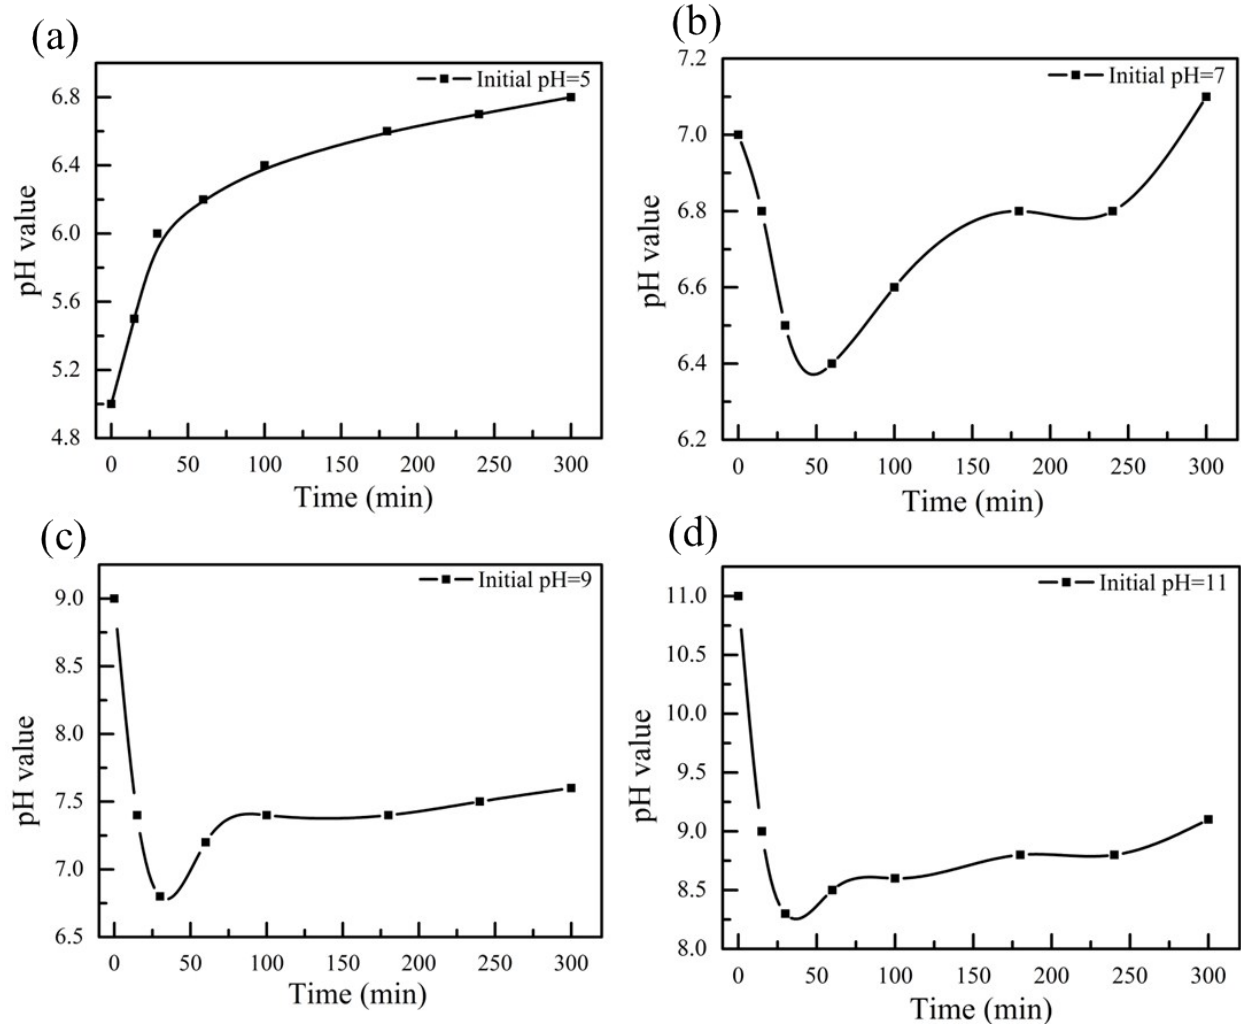

**Figure S2** Variations of pH values as a function of time.
